# Supplementary material
Source: publisher site journal article supplement (https://www.dovepress.com/article/486276)
Supplement: Supplementary file 1 [file get_supplementary_file.php]

**Table S1**. 5W1H checklist used to investigate the reasons of sample rejection

| **Why** | **5.3** | **5.4** | **5.5** | **5.6** | **5.7** | **5.8** | **5.9** | **Sum** |
| --- | --- | --- | --- | --- | --- | --- | --- | --- |
| Sample without Collection Info | 5 | 5 | 2 | 8 | 40 | 13 | 13 | 85 |
| Clotted samples | 0 | 1 | 0 | 2 | 2 | 0 | 3 | 8 |
| Incorrect sample type | 0 | 0 | 0 | 2 | 4 | 1 | 0 | 7 |
| haemolysed samples | 0 | 1 | 0 | 1 | 3 | 0 | 1 | 6 |
| Incorrect specimen collection container | 0 | 0 | 0 | 0 | 5 | 0 | 0 | 5 |
| poor-quality sputum specimens | 0 | 4 | 0 | 0 | 0 | 0 | 0 | 4 |
| Sample leaked in transit | 0 | 0 | 0 | 1 | 0 | 0 | 0 | 1 |
| Insufficient specimen volume | 0 | 0 | 0 | 0 | 0 | 1 | 0 | 1 |
| Sum | 5 | 11 | 2 | 14 | 54 | 15 | 16 | 117 |
| **What:** Investigate the reasons for sample recall | | | | | | | | |
| **Who:** Personnel :LBJ | | | | | | | | |
| **When:** May 3, 2021 to May 9, 2021 | | | | | | | | |
| **Where:** Clinical laboratory | | | | | | | | |
| **How:** Retrieve sample recall records using the Laboratory Information System | | | | | | | | |

**Table S2.** Root Cause Analysis (RCA) Scoring Sheet for “Sample without Collection Info”

| **Cause** | **Score** | | | | | | | |  |
| --- | --- | --- | --- | --- | --- | --- | --- | --- | --- |
| **Member1** | **Member2** | **Member3** | **Member4** | **Member5** | **Member6** | **Member7** | **Member8** | **Sum** |
| **People** |  |  |  |  |  |  |  |  |  |
| Nurses forget to scan the bar code | 3 | 3 | 3 | 5 | 5 | 3 | 5 | 3 | 30 |
| Inadequate supervision | 5 | 5 | 5 | 5 | 5 | 5 | 5 | 5 | 40 |
| **Equipment** |  |  |  |  |  |  |  |  |  |
| Bar code scanning devices are not sensitive | 3 | 3 | 3 | 3 | 3 | 3 | 1 | 1 | 20 |
| The computer software lacks a sample bar code scanning interface | 1 | 1 | 3 | 1 | 1 | 1 | 1 | 1 | 10 |
| **Policy** |  |  |  |  |  |  |  |  |  |
| Inconsistent operational procedures in some departments | 5 | 3 | 5 | 3 | 5 | 3 | 3 | 3 | 30 |
| Inadequate communication and dissemination of the new specimen collection process | 5 | 5 | 5 | 5 | 5 | 5 | 5 | 5 | 40 |
| **Material** |  |  |  |  |  |  |  |  |  |
| blurred bar code | 3 | 3 | 3 | 3 | 3 | 3 | 3 | 3 | 24 |
| Note: In the quality control circle, members have assigned ratings on a scale of 1 (not important), 3 (moderately important), and 5 (very important) to assess each factor. A total of 8 circle members participated in the scoring process, with a maximum possible total score of 40. According to the Pareto principle, factors scoring 32 or above are considered root causes. | | | | | | | | | |

**Table S3.** Root Cause Analysis (RCA) Scoring Sheet for “Clotted Specimen”

| **Cause** | **Score** | | | | | | | | |
| --- | --- | --- | --- | --- | --- | --- | --- | --- | --- |
| **Member1** | **Member2** | **Member3** | **Member4** | **Member5** | **Member6** | **Member7** | **Member8** | **Sum** |
| **People** |  |  |  |  |  |  |  |  |  |
| Patient's medication intake | 3 | 3 | 3 | 3 | 3 | 3 | 3 | 1 | 20 |
| Inadequate post-blood collection mixing | 5 | 5 | 5 | 5 | 5 | 5 | 5 | 5 | 40 |
| **Equipment** |  |  |  |  |  |  |  |  |  |
| Suboptimal blood flow during venipuncture | 5 | 5 | 5 | 5 | 5 | 5 | 5 | 5 | 40 |
| **Policy** |  |  |  |  |  |  |  |  |  |
| Incorrect specimen collection order | 3 | 5 | 5 | 3 | 5 | 5 | 5 | 5 | 36 |
| **Material** |  |  |  |  |  |  |  |  |  |
| Non-compliant blood collection tube quality | 3 | 5 | 5 | 3 | 5 | 3 | 5 | 3 | 30 |
| Note: In the quality control circle, members have assigned ratings on a scale of 1 (not important), 3 (moderately important), and 5 (very important) to assess each factor. A total of 8 circle members participated in the scoring process, with a maximum possible total score of 40. According to the Pareto principle, factors scoring 32 or above are considered root causes. | | | | | | | | | |

**Table S4.** The Fundamental Cause and Interventions Measures

| **Factors** | **Fundamental Cause** | **Interventions Measures** |
| --- | --- | --- |
| Sample without Collection Info | 1. inadequate communication and dissemination of the new specimen collection process | Establish a WeChat group for specimen collection coordinators. If a nurse has any questions about the collection conditions or procedures for a specimen, they can directly consult with our colleagues in the group |
| 1. inadequate supervision | Set up a quality control team in the nursing department |
| 1. Bar code scanning devices are not sensitive | Organize regular maintenance of personal digital assistant (PDA) devices by nursing staff |
| 1. the computer software lacks a sample bar code scanning interface | Coordinate with the Information Technology Department to maintain computer software without collection interfaces. |
| 1. blurred bar code | Conduct training on the use of bar code printers. |
| 1. inconsistent operational procedures in some departments | Develop a standard operating procedure (SOP) for the specimen collection process and communicate it to clinical nurses and laboratory staff through a meeting. Distribute the SOP and provide training and competency assessment for all nurses involved. |
| 1. nurses forget to scan the bar code | Strengthen training for all nurses, and nursing assistants who may transport specimens. Include forgetting to scan the bar code as one of the performance evaluation indicators for nurse compensation |
| Clotted samples | 1. Incorrect specimen collection order | Develop a SOP for the specimen collection process and provide training on blood collection order. |
| 1. patient's medication intake | Inform the Nursing Department to inquire about medication usage before blood collection and implement measures to delay blood collection for patients taking medication |
| 1. Sub-optimal blood flow during venipuncture | Standardize blood collection procedures, with a tourniquet application time not exceeding 1 minute. |
| 1. non-compliant blood collection tube quality | Establish a management program for the quality of reagents and consumables in the laboratory and enhance their quality control. |
| 1. inadequate post-blood collection mixing | Standardize the number of inversions for blood collection tubes. |

**Table S5**. 5W1H checklist used to investigate the reasons for sample rejection after QCC activities

| **Why** | **6.6** | **6.7** | **6.8** | **6.9** | **6.10** | **6.11** | **6.12** | **Sum** |
| --- | --- | --- | --- | --- | --- | --- | --- | --- |
| Sample without Collection Info | 0 | 2 | 11 | 3 | 7 | 3 | 0 | 26 |
| Clotted samples | 2 | 1 | 2 | 0 | 0 | 1 | 0 | 6 |
| Incorrect sample type | 0 | 0 | 0 | 0 | 0 | 0 | 0 | 0 |
| haemolysed samples | 1 | 1 | 0 | 0 | 0 | 0 | 0 | 2 |
| Incorrect specimen collection container | 0 | 1 | 1 | 0 | 1 | 0 | 0 | 3 |
| poor-quality sputum specimens | 0 | 0 | 0 | 2 | 0 | 10 | 0 | 12 |
| Sample leaked in transit | 0 | 1 | 0 | 0 | 0 | 0 | 0 | 1 |
| Insufficient specimen volume | 0 | 0 | 1 | 0 | 0 | 0 | 1 | 2 |
| Sum | 3 | 6 | 15 | 5 | 8 | 14 | 1 | 52 |
| **What:** Investigate the reasons for sample recall | | | | | | | | |
| **Who:** Personnel LBJ | | | | | | | | |
| **When:** June 6, 2022 to June 12, 2022 | | | | | | | | |
| **Where:** Clinical laboratory | | | | | | | | |
| **How:** Retrieve sample recall records using the Laboratory Information System | | | | | | | | |


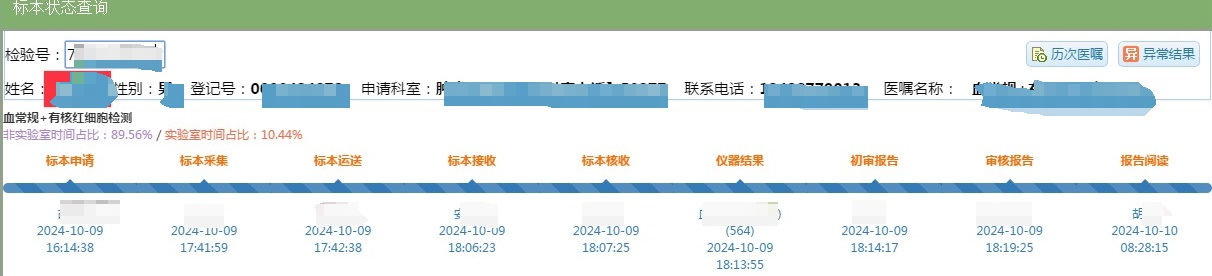


**Figure S1**. Display of the specimen collection process after scanning in the laboratory
